# Supplementary material for: Spatial charge separation and high-index facet dependence in polyhedral Cu2O type-II surface heterojunctions for photocatalytic activity enhancement
Source: Royal Society of Chemistry journal article supplement (doi:10.1039/d1qi00031d), 2021-01-01
Supplement: d1qi00031d1.pdf [file d1qi00031d1.pdf]

*Supporting Information*

**Spatial charge separation and high-index facet dependence  
in polyhedral Cu<sub>2</sub>O type-II surface heterojunctions for  
photocatalytic activity enhancement**

**Xin Zhang, Shaodong Sun,\* Jie Cui, Man Yang,\* Qiao Zhang, Peng Xiao,  
Jiandong Li, Qing Yang and Shuhua Liang\***

*Engineering Research Center of Conducting Materials and Composite Technology,  
Ministry of Education; Shaanxi Engineering Research Center of Metal-Based  
Heterogeneous Materials and Advanced Manufacturing Technology; Shaanxi  
Province Key Laboratory for Electrical Materials and Infiltration Technology; School  
of Materials Science and Engineering, Xi'an University of Technology, Xi'an 710048,  
Shaanxi, People's Republic of China.*

**E-mail:** sdsun@xaut.edu.cn (S. D. Sun), myang@xaut.edu.cn (M. Yang),  
liangsh@xaut.edu.cn (S. H. Liang).

## Experimental Section

**Computational details.** Utilizing the projected augmented wave (PAW) method to study density functional calculations, executed in the Vienna *ab initio* simulation package (VASP) code.<sup>[1]</sup> The exchange-correlation functional adopted the generalized gradient approximation of Perdew, Burke, and Ernzerhof (PBE).<sup>[2]</sup> In order to minimize the interaction between adjacent slabs, the periodic boundary condition with a vacuum space of 15 Å was used. The kinetic energy cutoff was programmed to be 400 eV. Monkhorst–Pack uncommon k-point meshes<sup>[3]</sup> of 3×3×1 and 1×2×1 was recommended to {001} and {332} facets in the optimization process, while 7×7×1 and 3×7×1 were embraced by DOS calculations.

The surface free energy of Cu<sub>2</sub>O {111} and {332} facets was calculated by *ab initio* thermodynamic approach, according to the surface linking with an oxygen atmosphere, which was described by an oxygen pressure,  $p$ , and temperature,  $T$ . Since surface system is modeled by symmetrical slabs with two equivalent surfaces, the surface free energy at given  $(T, p)$  can be expressed as:

$$\gamma_{\text{surf}}(T, p) = \frac{1}{2A} [G_{\text{slab}}(T, p, N_{\text{Cu}}, N_{\text{O}}) - N_{\text{Cu}}\mu_{\text{Cu}}(T, p) - N_{\text{O}}\mu_{\text{O}}(T, p)] \quad (1)$$

Here,  $A$  is the area exposed to a unit cell,  $G_{\text{slab}}$  is the Gibbs free energy of the slab,  $\mu_{\text{Cu}}$  and  $\mu_{\text{O}}$  are the chemical potentials of copper and oxygen, while  $N_{\text{Cu}}$  and  $N_{\text{O}}$  are the number of Cu and O atoms. Thermodynamically the surface with the lowest  $\gamma_{\text{surf}}(T, p)$  under certain conditions  $(T, p)$  corresponds to the most stable surface.

It has been proved in eq (1)<sup>[4,5]</sup> that Gibbs free energies of solids can be expressed as a first approximation total energies. Thus  $\gamma_{\text{surf}}(T, p)$  can be approximated by:

$$\gamma_{\text{surf}}(T, p) \approx \frac{1}{2A} \left[ E_{\text{slab}} - \frac{N_{\text{Cu}}}{2} E_{\text{Cu}_2\text{O}}^{\text{bulk}} - \Delta N_{\text{O}}^{\text{stoich}} \mu_{\text{O}}(T, p) \right] \quad (2a)$$

where

$$\Delta N_{\text{O}}^{\text{stoich}} = (N_{\text{O}} - \frac{N_{\text{Cu}}}{2}) \quad \text{and} \quad (2b)$$

$$E_{\text{Cu}_2\text{O}}^{\text{bulk}} \approx 2\mu_{\text{Cu}}(T, p) + \mu_{\text{O}}(T, p). \quad (2c)$$

The  $E_{\text{slab}}$  and  $E_{\text{Cu}_2\text{O}}^{\text{bulk}}$  are total energies of the slab and of the formula unit of  $\text{Cu}_2\text{O}$  bulk, respectively. The  $\Delta N_{\text{O}}^{\text{stoich}}$  is the number of excess O atoms.

Before establishing the function between oxygen chemical potential ( $\mu_{\text{O}}$ ) and  $\gamma_{\text{surf}}(T, p)$ , the oxygen poor limit ( $\text{O}_{\text{lean}}$ ) and oxygen rich limit ( $\text{O}_{\text{rich}}$ ) should be considered. The  $\text{O}_{\text{lean}}$  can be regarded as  $\mu_{\text{O}}$  corresponding to the decomposition of bulk  $\text{Cu}_2\text{O}$  into bulk Cu and  $\text{O}_2$  gas, nevertheless at  $\text{O}_{\text{rich}}$  oxygen gas condenses on the surface. The  $\text{O}_{\text{lean}}$  and  $\text{O}_{\text{rich}}$  limits are determined by eqs (3a) and (3b), respectively.

$$\mu_{\text{O}}^{\text{min}} = E_{\text{Cu}_2\text{O}}^{\text{bulk}} - E_{\text{Cu}}^{\text{bulk}} \quad \text{and} \quad \mu_{\text{Cu}}^{\text{max}} = E_{\text{Cu}}^{\text{bulk}} \quad (3a)$$

$$\mu_{\text{O}}^{\text{max}} = \frac{1}{2} E_{\text{O}_2} \quad \text{and} \quad \mu_{\text{Cu}}^{\text{min}} = \frac{1}{2} \left[ E_{\text{Cu}_2\text{O}}^{\text{bulk}} - \frac{1}{2} E_{\text{O}_2} \right] \quad (3b)$$

where  $E_{\text{Cu}}^{\text{bulk}}$  and  $E_{\text{O}_2}$  are total energies of Cu atom in the Cu-bulk and isolated  $\text{O}_2$  molecule, respectively. Half the total energy of  $\text{O}_2$  molecule is chosen as the zero reference for  $\mu_{\text{O}}(p, T)$ .

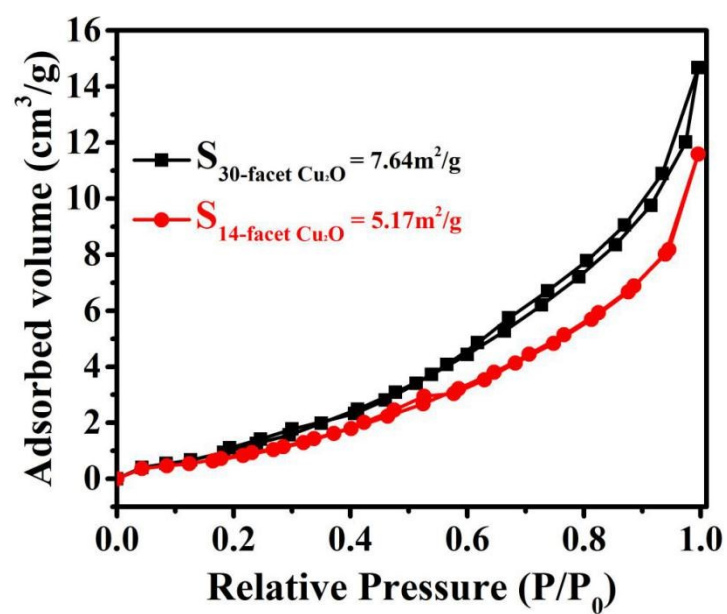

**Fig. S1** N<sub>2</sub> adsorption/desorption isotherms for the 30-facet and 14-facet Cu<sub>2</sub>O, respectively.

## References

- [1] G. Kresse and D. Joubert, From ultrasoft pseudopotentials to the projector augmented-wave method, *Phys. Rev. B*, 1998, **59**, 1758-1775.
- [2] J. P. Perdew, K. Burke and M. Ernzerhof, Generalized Gradient Approximation Made Simple, *Phys. Rev. Lett.*, 1996, **77**, 3865-3868.
- [3] H. J. Monkhorst and J. D. Pack, Special points for Brillouin-zone integrations, *Phys. Rev. B*, 1976, **13**, 5188-5192.
- [4] A. Kokalj and S. Peljhan, Density functional theory study of adsorption of benzotriazole on Cu<sub>2</sub>O surfaces, *J. Phys. Chem. C*, 2015, **119**, 11625-11635.
- [5] K. Reuter, and M. Scheffler, Composition, structure and stability of RuO<sub>2</sub> (110) as a function of oxygen pressure, *Phys. Rev. B*, 2001, **65**, 035406.
